# Supplementary material for: Micelle/Hydrogel Composite as a “Natural Self-Emulsifying Reversible Hybrid Hydrogel (N’SERH)” Enhances the Oral Bioavailability of Free (Unconjugated) Resveratrol
Source: PubMed Central journal article supplement — ACS Omega. 2022 Apr 6;7(15):12835–45. doi: 10.1021/acsomega.2c00116 (PMC9026114; doi:10.1021/acsomega.2c00116), 2022-04-06
Supplement: ao2c00116_si_001.pdf [file ao2c00116_si_001.pdf]

**Micelle/Hydrogel Composite as a 'Natural Self-Emulsifying Reversible Hybrid-Hydrogel (N'SERH)' Enhances the Oral Bioavailability of Free (Unconjugated) Resveratrol**

Ashil Joseph, Abhilash Balakrishnan, Prasanth Shanmughan, Balu Maliakel, and Krishnakumar Illathu Madhavamenon\*

R&D Centre, Akay Natural Ingredients, Ambunadu, Malaidamthuruth P.O., Cochin- 683561, Id

**\*Corresponding author:** [krishnakumar.im@akay-group.com](mailto:krishnakumar.im@akay-group.com)

Tel: +91 9447 735 958; Fax: +91 484 2680891

**Table S1.** Demographic, biochemical and hematological details of the participants.

| <b>Parameter</b>                          | <b>Male</b>       | <b>Female</b>     |
|-------------------------------------------|-------------------|-------------------|
| No. of volunteers                         | 10                | 6                 |
| Age (years)                               | 37.30 ± 7.99      | 32.83 ± 4.67      |
| BMI                                       | 26.38 ± 2.13      | 25.10 ± 1.60      |
| <b>Hematology</b>                         |                   |                   |
| <i>Hemoglobin (g/dL)</i>                  | 16.09 ± 1.35      | 14.22 ± 0.93      |
| <i>Total leukocyte count (cells/cumm)</i> | 7720.00 ± 1146.78 | 6993.33 ± 1002.04 |
| <i>Total RBC count (million/cumm)</i>     | 5.62 ± 0.63       | 5.13 ± 0.37       |
| <i>Platelet (lakhs/cumm)</i>              | 2.04 ± 0.44       | 2.25 ± 0.83       |
| <i>Lymphocytes (%)</i>                    | 34.70 ± 6.75      | 33.83 ± 3.76      |
| <i>Eosinophil's (%)</i>                   | 3.30 ± 0.95       | 4.33 ± 0.82       |
| <i>Neutrophils (%)</i>                    | 58.00 ± 6.91      | 57.33 ± 4.59      |
| <i>Monocytes (%)</i>                      | 4.00 ± 1.33       | 4.50 ± 1.64       |
| <b>Biochemical</b>                        |                   |                   |
| <i>ALT (U/L)</i>                          | 36.90 ± 8.05      | 34.50 ± 6.12      |
| <i>AST (U/L)</i>                          | 25.40 ± 5.97      | 21.17 ± 4.07      |
| <i>ALP (U/L)</i>                          | 70.90 ± 15.21     | 65.83 ± 11.30     |
| <i>Total protein (g/dL)</i>               | 7.39 ± 0.53       | 7.08 ± 0.34       |
| <i>Bilirubin (mg/dL)</i>                  | 0.49 ± 0.14       | 0.54 ± 0.10       |
| <i>Albumin (g/dL)</i>                     | 4.61 ± 0.41       | 4.45 ± 0.19       |
| <i>Globulin (g/dL)</i>                    | 2.81 ± 0.36       | 2.72 ± 0.56       |
| <i>A/G ratio</i>                          | 1.65:1            | 1.69:1            |
| <i>Cholesterol (mg/dL)</i>                | 178.70 ± 20.72    | 171.12 ± 9.45     |
| <i>Triglycerides (mg/dL)</i>              | 113.70 ± 29.78    | 90.00 ± 13.05     |
| <i>HDL (mg/dL)</i>                        | 58.70 ± 7.78      | 49.50 ± 3.42      |
| <i>LDL (mg/dL)</i>                        | 93.70 ± 6.40      | 92.67 ± 4.46      |
| <i>Creatinine (mg/dL)</i>                 | 0.79 ± 0.11       | 0.72 ± 0.09       |

*HDL – High-density lipoprotein, LDL – Low-density lipoprotein, ALT – Alanine aminotransferase, AST – Aspartate aminotransferase, ALP – Alkaline phosphatase, RBC – Red blood cell, BMI – Body mass index.*
